# Supplementary material
Source: publisher site journal article supplement (https://www.dovepress.com/get_supplementary_file.php?f=351576.docx)
Supplement: Supplementary file 1 [file get_supplementary_file.php]

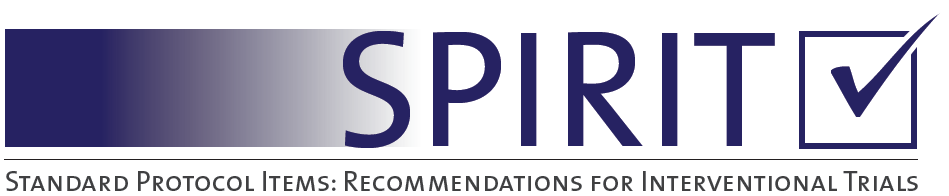


Supplementary File: SPIRIT 2013 Checklist: Recommended items to address in a clinical trial protocol and related documents*

| Section/item | Item No | Description | Page Number on which item is reported |
| --- | --- | --- | --- |
| **Administrative information** | | |  |
| Title | 1 | Descriptive title identifying the study design, population, interventions, and, if applicable, trial acronym | Page 1 (Line 1-3) |
| Trial registration | 2a | Trial identifier and registry name. If not yet registered, name of intended registry | Page 2 (Line 40) |
| 2b | All items from the World Health Organization Trial Registration Data Set | items 1 and 2: Page 6 (Line 112-113);  item3: no secondary identifying numbers;  item 4: Page 20 (Line 428-429);  items 5-6: Page 20 (Line 428-429);  items 7: Rehabilitation Department of Integrated Chinese and Western Medicine, Beijing Xiaotangshan Hospital, No. 390 Spring Road, Changping District, Beijing, 102211, China. Tel: +861061789644  item 8: Page 1 (Line 14-18);  item 9: moxibustion smoke for shoulder hand syndrome after stroke: a randomized clinical trial;  item 10: Page 1 (Line 1-3);  item 11: Page 5-6 (Line 108-111);  item 12: Page 6 (Line 125-128)  item 13: Page 9-11 (Line 192-233);  item 14: Page 6-7 (Line 131-151);  item 15: Page 5 (Line 108-110);  item 16: Page 6 (Line 114-115);  item 17: Page 13-14 (Line 280-290);  item 18: Page 13 (Line 266-268);  item 19: Page 11 (Line 237-242);  item 20: Page 12 (Line 245-261);  item 21: Page 19 (Line 405-411);  item 22: Page 6 (Line 114-115);  item 23: no results;  item 24: yes. IPD will be obtained on request of corresponding author. |
| Protocol version | 3 | Date and version identifier | Page 19 (Line 405-411) (version 1.0. 2021-01-13) |
| Funding | 4 | Sources and types of financial, material, and other support | Page 20 (Line 428-430) |
| Roles and responsibilities | 5a | Names, affiliations, and roles of protocol contributors | Page 1 (Line 5-12) |
| 5b | Name and contact information for the trial sponsor | Page 20 (Line 428-430) |
|  | 5c | Role of study sponsor and funders, if any, in study design; collection, management, analysis, and interpretation of data; writing of the report; and the decision to submit the report for publication, including whether they will have ultimate authority over any of these activities | Role of study sponsor and funders is mainly for financial support. |
|  | 5d | Composition, roles, and responsibilities of the coordinating centre, steering committee, endpoint adjudication committee, data management team, and other individuals or groups overseeing the trial, if applicable (see Item 21a for data monitoring committee) | Page 5-6. |
| Introduction |  |  |  |
| Background and rationale | 6a | Description of research question and justification for undertaking the trial, including summary of relevant studies (published and unpublished) examining benefits and harms for each intervention | Page 2-5 (Line 45-104) |
|  | 6b | Explanation for choice of comparators | Page 3 (Line 56-62) |
| Objectives | 7 | Specific objectives or hypotheses | Page 1-2 (Line 21-23) |
| Trial design | 8 | Description of trial design including type of trial (eg, parallel group, crossover, factorial, single group), allocation ratio, and framework (eg, superiority, equivalence, noninferiority, exploratory) | Page 2 (Line 24-39) |
| Methods: Participants, interventions, and outcomes | | |  |
| Study setting | 9 | Description of study settings (eg, community clinic, academic hospital) and list of countries where data will be collected. Reference to where list of study sites can be obtained | Page 5-6 (Line 108-119) |
| Eligibility criteria | 10 | Inclusion and exclusion criteria for participants. If applicable, eligibility criteria for study centres and individuals who will perform the interventions (eg, surgeons, psychotherapists) | Page 6-7 (Line 125-151) |
| Interventions | 11a | Interventions for each group with sufficient detail to allow replication, including how and when they will be administered | Page 9-11 (Line 192-233) |
| 11b | Criteria for discontinuing or modifying allocated interventions for a given trial participant (eg, drug dose change in response to harms, participant request, or improving/worsening disease) | There was no special criteria for discontinuing or modifying allocated interventions. |
| 11c | Strategies to improve adherence to intervention protocols, and any procedures for monitoring adherence (eg, drug tablet return, laboratory tests) | Page 13 (Line 273-277) |
| 11d | Relevant concomitant care and interventions that are permitted or prohibited during the trial | Page 9 (Line 192-196) |
| Outcomes | 12 | Primary, secondary, and other outcomes, including the specific measurement variable (eg, systolic blood pressure), analysis metric (eg, change from baseline, final value, time to event), method of aggregation (eg, median, proportion), and time point for each outcome. Explanation of the clinical relevance of chosen efficacy and harm outcomes is strongly recommended | Page 11-12 (Line 236-261) |
| Participant timeline | 13 | Time schedule of enrolment, interventions (including any run-ins and washouts), assessments, and visits for participants. A schematic diagram is highly recommended (see Figure) | Page 6 (Figure1) |
| Sample size | 14 | Estimated number of participants needed to achieve study objectives and how it was determined, including clinical and statistical assumptions supporting any sample size calculations | Page 13-14 (Line 280-290) |
| Recruitment | 15 | Strategies for achieving adequate participant enrolment to reach target sample size | Page 7-8 (Line 153-159) |
| **Methods: Assignment of interventions (for controlled trials)** | | |  |
| Allocation: |  |  |  |
| Sequence generation | 16a | Method of generating the allocation sequence (eg, computer-generated random numbers), and list of any factors for stratification. To reduce predictability of a random sequence, details of any planned restriction (eg, blocking) should be provided in a separate document that is unavailable to those who enrol participants or assign interventions | Page 8 (Line 162-167) |
| Allocation concealment mechanism | 16b | Mechanism of implementing the allocation sequence (eg, central telephone; sequentially numbered, opaque, sealed envelopes), describing any steps to conceal the sequence until interventions are assigned | Page 8 (Line 168-171) |
| Implementation | 16c | Who will generate the allocation sequence, who will enrol participants, and who will assign participants to interventions | Page 8 (Line 162-167) |
| Blinding (masking) | 17a | Who will be blinded after assignment to interventions (eg, trial participants, care providers, outcome assessors, data analysts), and how | Page 8-9 (Line 174-187) |
|  | 17b | If blinded, circumstances under which unblinding is permissible, and procedure for revealing a participant’s allocated intervention during the trial | Unblinding during the trial is unnecessary. |
| **Methods: Data collection, management, and analysis** | | |  |
| Data collection methods | 18a | Plans for assessment and collection of outcome, baseline, and other trial data, including any related processes to promote data quality (eg, duplicate measurements, training of assessors) and a description of study instruments (eg, questionnaires, laboratory tests) along with their reliability and validity, if known. Reference to where data collection forms can be found, if not in the protocol | Page 14-15 (Line 303-316) |
|  | 18b | Plans to promote participant retention and complete follow-up, including list of any outcome data to be collected for participants who discontinue or deviate from intervention protocols | Page 14-15 (Line 303-316) |
| Data management | 19 | Plans for data entry, coding, security, and storage, including any related processes to promote data quality (eg, double data entry; range checks for data values). Reference to where details of data management procedures can be found, if not in the protocol | Page 14-15 (Line 303-316) |
| Statistical methods | 20a | Statistical methods for analysing primary and secondary outcomes. Reference to where other details of the statistical analysis plan can be found, if not in the protocol | Page 14 (Line 293-300) |
|  | 20b | Methods for any additional analyses (eg, subgroup and adjusted analyses) | There are no additional analyses planned. |
|  | 20c | Definition of analysis population relating to protocol non-adherence (eg, as randomised analysis), and any statistical methods to handle missing data (eg, multiple imputation) | Page 14 (Line 293-300) |
| **Methods: Monitoring** | | |  |
| Data monitoring | 21a | Composition of data monitoring committee (DMC); summary of its role and reporting structure; statement of whether it is independent from the sponsor and competing interests; and reference to where further details about its charter can be found, if not in the protocol. Alternatively, an explanation of why a DMC is not needed | This trial is an exploratory RCT with a short trial period, and anticipated without severe safety problem, so a DMC is not needed. |
|  | 21b | Description of any interim analyses and stopping guidelines, including who will have access to these interim results and make the final decision to terminate the trial | There are no anticipated problems that are detrimental to the participant, so we will not do an interim analysis. |
| Harms | 22 | Plans for collecting, assessing, reporting, and managing solicited and spontaneously reported adverse events and other unintended effects of trial interventions or trial conduct | Page 11-12 (Line 264-272) |
| Auditing | 23 | Frequency and procedures for auditing trial conduct, if any, and whether the process will be independent from investigators and the sponsor | Page 20 (Line 428-430) |
| Ethics and dissemination | | |  |
| Research ethics approval | 24 | Plans for seeking research ethics committee/institutional review board (REC/IRB) approval | Page 19 (Line 405-411) |
| Protocol amendments | 25 | Plans for communicating important protocol modifications (eg, changes to eligibility criteria, outcomes, analyses) to relevant parties (eg, investigators, REC/IRBs, trial participants, trial registries, journals, regulators) | The protocol of this trial is fully discussed by specialists of acupuncture, rehabilitation, neurology, methodology and statistics. In case of important protocol modifications (eg, changes to eligibility criteria, outcomes, analyses), the ethic committee and the centre will be notified. After the re-approval by ethic committee, a copy of the revised protocol will be provided to the centre. We will also update the protocol in the clinical trial registry. |
| Consent or assent | 26a | Who will obtain informed consent or assent from potential trial participants or authorised surrogates, and how (see Item 32) | Page 8 (Line 155-159) |
|  | 26b | Additional consent provisions for collection and use of participant data and biological specimens in ancillary studies, if applicable | On the consent form, participants will be asked for permission for the research team, ethics committee and regulatory authorities to use their data. This trial does not involve collecting and use of participant data and biological specimens in ancillary studies. |
| Confidentiality | 27 | How personal information about potential and enrolled participants will be collected, shared, and maintained in order to protect confidentiality before, during, and after the trial | The personal information of the participants will be kept by the research centre, and only the project management group, research center and ethics committee of the trial can access the records. The personal information of the participants will not appear in the published materials or reports. |
| Declaration of interests | 28 | Financial and other competing interests for principal investigators for the overall trial and each study site | Page 20 (Line 433) |
| Access to data | 29 | Statement of who will have access to the final trial dataset, and disclosure of contractual agreements that limit such access for investigators | Any data required to support the protocol can be supplied on request. |
| Ancillary and post-trial care | 30 | Provisions, if any, for ancillary and post-trial care, and for compensation to those who suffer harm from trial participation | There is no anticipated harm and compensation for trial participation. No post-trial care is planned. |
| Dissemination policy | 31a | Plans for investigators and sponsor to communicate trial results to participants, healthcare professionals, the public, and other relevant groups (eg, via publication, reporting in results databases, or other data sharing arrangements), including any publication restrictions | Page 19 (Line 413-414) |
|  | 31b | Authorship eligibility guidelines and any intended use of professional writers | All named authors adhere to the authorship guidelines of Trials and have agreed to publication. |
|  | 31c | Plans, if any, for granting public access to the full protocol, participant-level dataset, and statistical code | Full protocol will be published on journal for public access. Participant-level dataset and statistical code can be supplied on request. |
| Appendices |  |  |  |
| Informed consent materials | 32 | Model consent form and other related documentation given to participants and authorised surrogates | This is available from the corresponding author on request. |
| Biological specimens | 33 | Plans for collection, laboratory evaluation, and storage of biological specimens for genetic or molecular analysis in the current trial and for future use in ancillary studies, if applicable | There are no biological specimens for genetic or molecular analysis in the current trial and for future use in ancillary studies. |

*It is strongly recommended that this checklist be read in conjunction with the SPIRIT 2013 Explanation & Elaboration for important clarification on the items. Amendments to the protocol should be tracked and dated. The SPIRIT checklist is copyrighted by the SPIRIT Group under the Creative Commons “[Attribution-NonCommercial-NoDerivs 3.0 Unported](http://www.creativecommons.org/licenses/by-nc-nd/3.0/)” license.
